# Supplementary material for: Synthesis and anticancer evaluation of acetylated-lysine conjugated gemcitabine prodrugs
Source: Royal Society of Chemistry journal article supplement (doi:10.1039/d3md00190c), 2023-01-01
Supplement: d3md00190c1.pdf [file d3md00190c1.pdf]

## Synthesis and Anticancer Evaluation of Acetylated-Lysine Conjugated Gemcitabine Prodrugs

Mengmeng Wang<sup>a,1</sup>, Kunyu Qu<sup>a,1</sup>, Peipei Zhao<sup>a</sup>, Xin Yin<sup>a</sup>, Yiwei Meng<sup>a</sup>, Piet Herdewijn<sup>b</sup>, Chao Liu<sup>c,\*</sup>, Lixin Zhang<sup>a,d,\*</sup>, Xuekui Xia<sup>a,\*</sup>

<sup>a</sup> Biology Institute, Qilu University of Technology (Shandong Academy of Sciences), Jinan, 250103, China

<sup>b</sup> Medicinal Chemistry, Rega Institute for Medical Research, KU Leuven, 3000 Leuven, Belgium

<sup>c</sup> Department of Medicinal Chemistry, Key Laboratory of Chemical Biology (Ministry of Education), School of Pharmaceutical Sciences, Shandong University, Jinan 250012, China

<sup>d</sup> State Key Laboratory of Bioreactor Engineering, and School of Biotechnology, East China University of Science and Technology (ECUST), Shanghai 200237, China

\*Corresponding author.

*Email address: chaoliu@sdu.edu.cn; lxzhang@ecust.edu.cn; xiakx@sdas.org.*

<sup>1</sup> Mengmeng Wang and Kunyu Qu contributed equally to this work.

### Table of Contents

|                                                                              |         |
|------------------------------------------------------------------------------|---------|
| 1. <sup>1</sup> H NMR, <sup>13</sup> C NMR, and HRMS spectra of all prodrugs | S2-S16  |
| 2. HPLC spectra of all prodrugs                                              | S17-S18 |

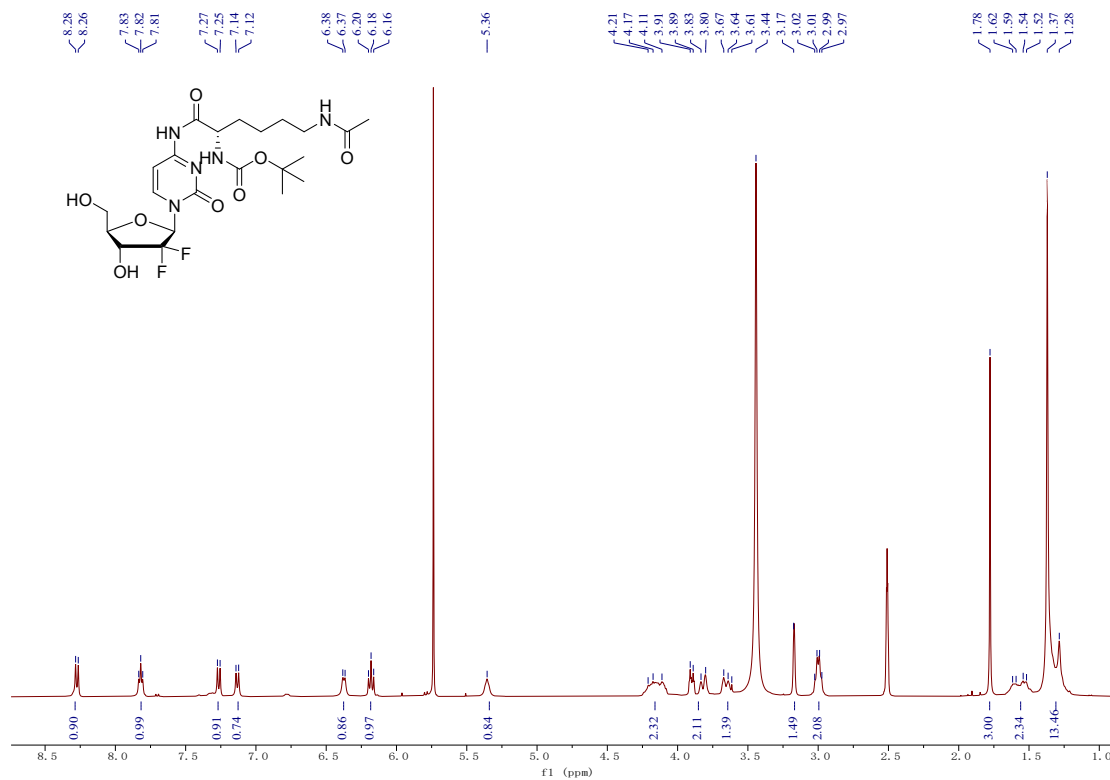

**<sup>1</sup>H NMR spectrum of Compound 1.**

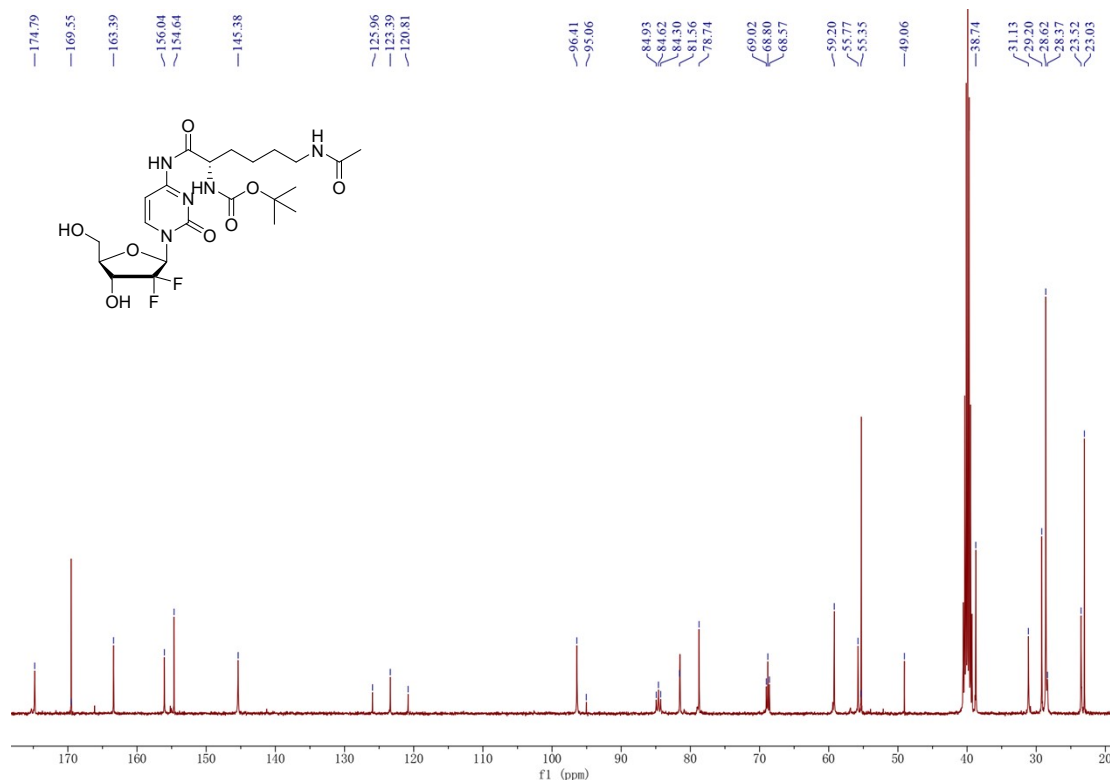

**<sup>13</sup>C NMR spectrum of Compound 1.**

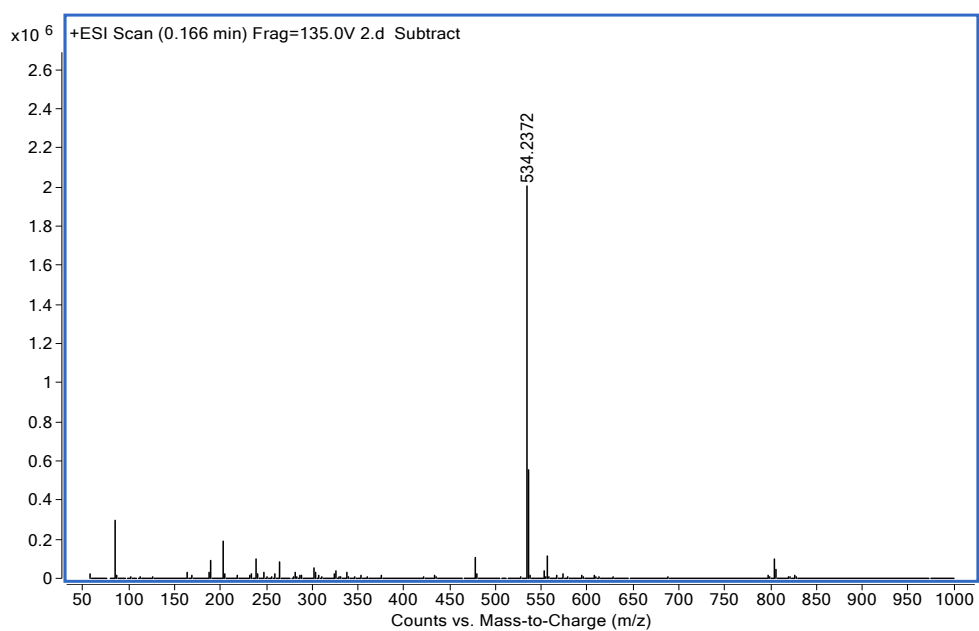

HRMS spectrum of Compound 1.

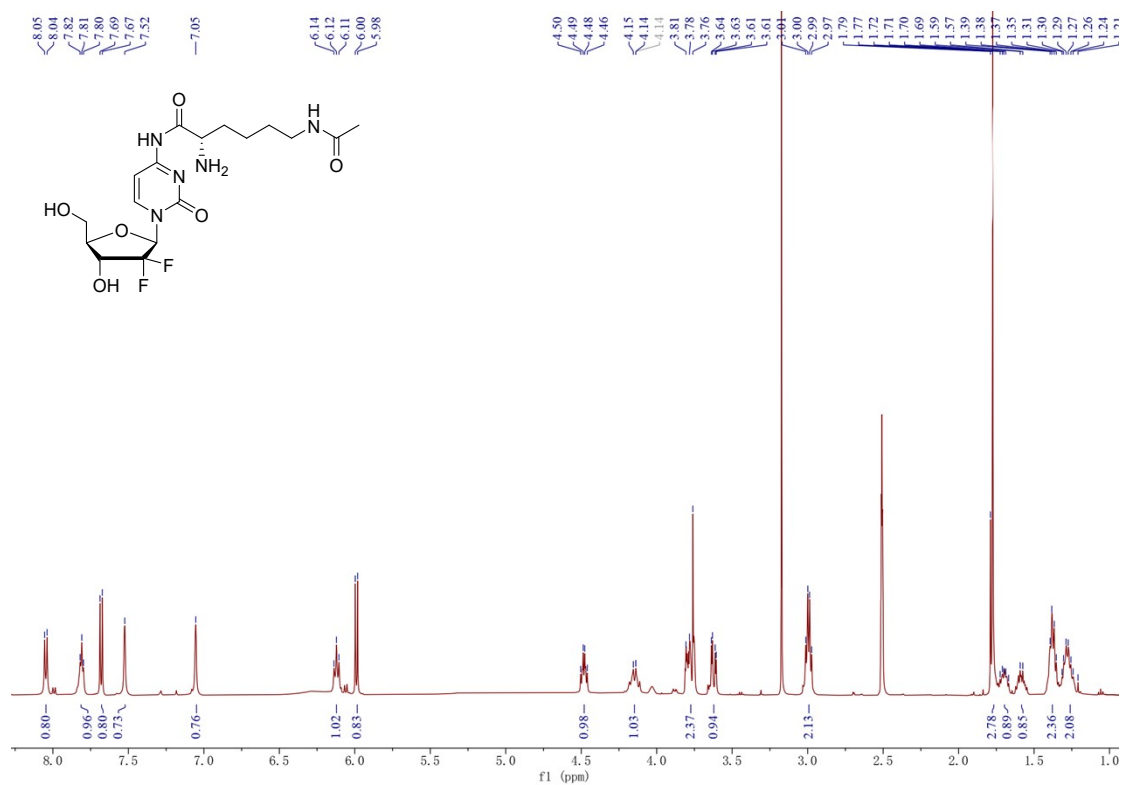

<sup>1</sup>H NMR spectrum of Compound 2.

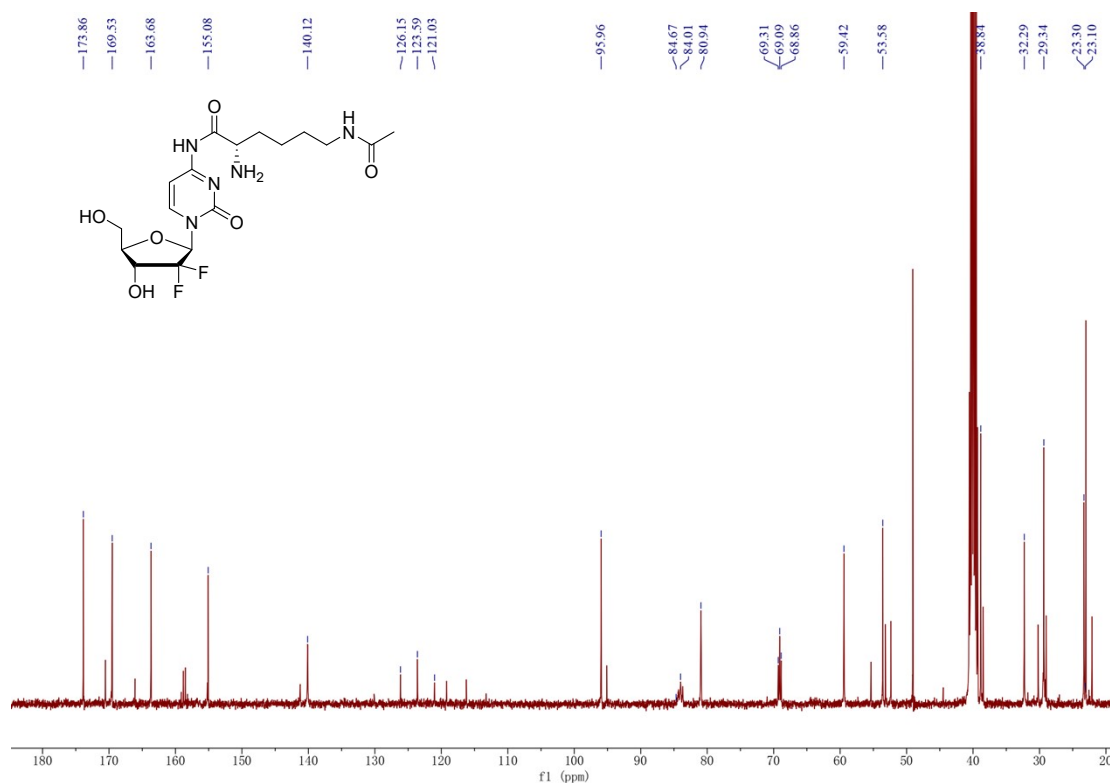

<sup>13</sup>C NMR spectrum of Compound 2.

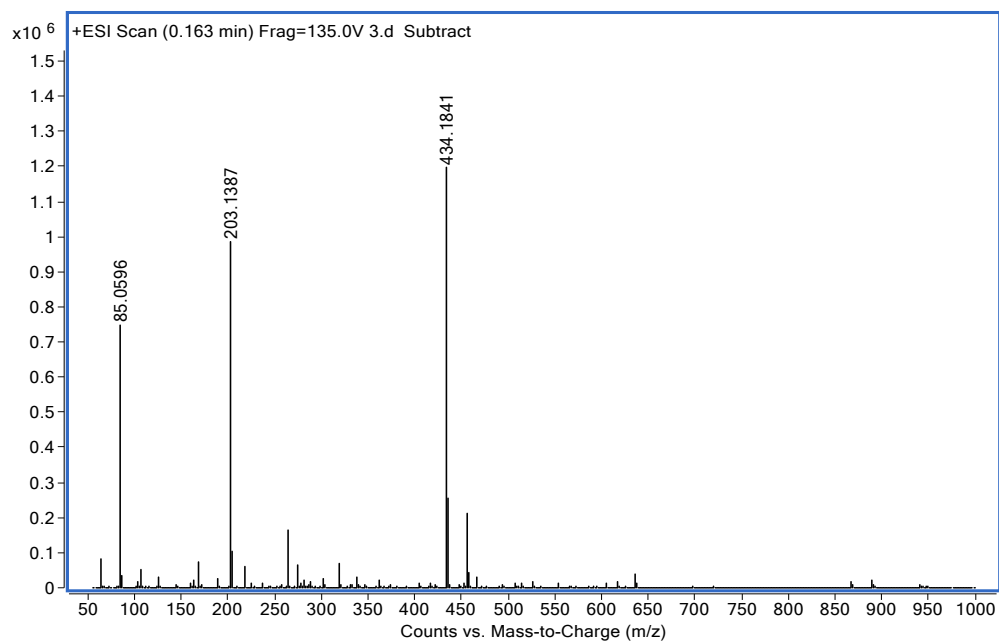

HRMS spectrum of Compound 2.

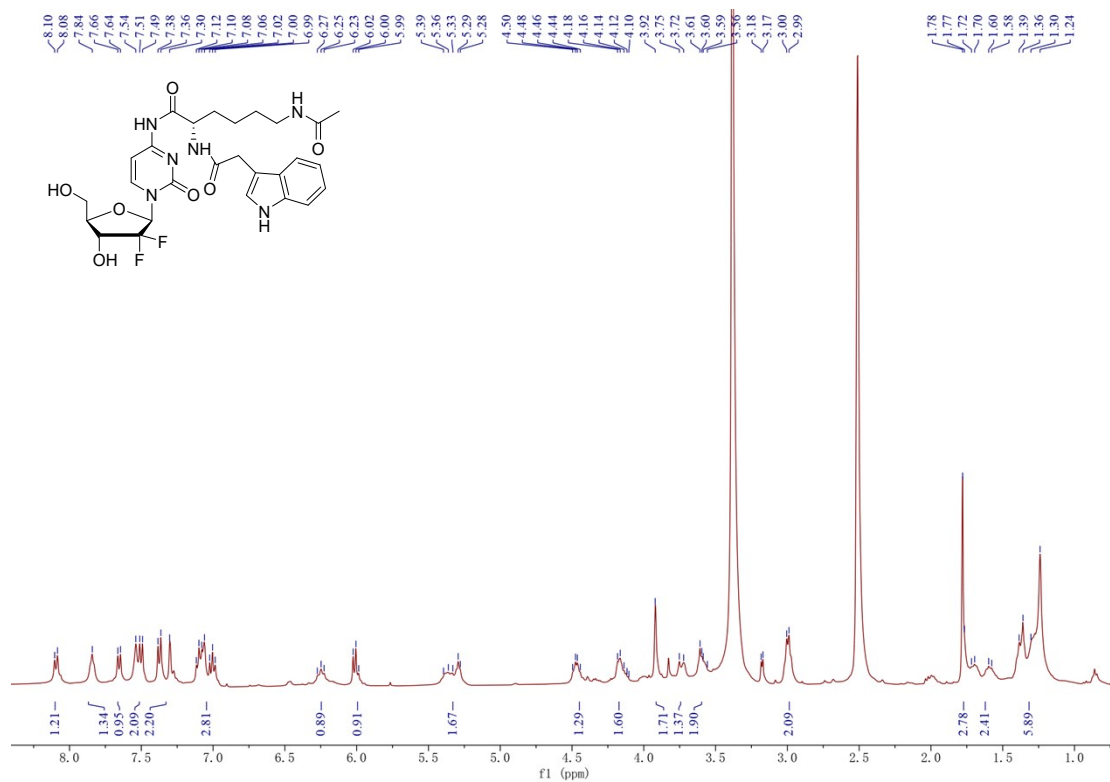

<sup>1</sup>H NMR spectrum of Compound 3.

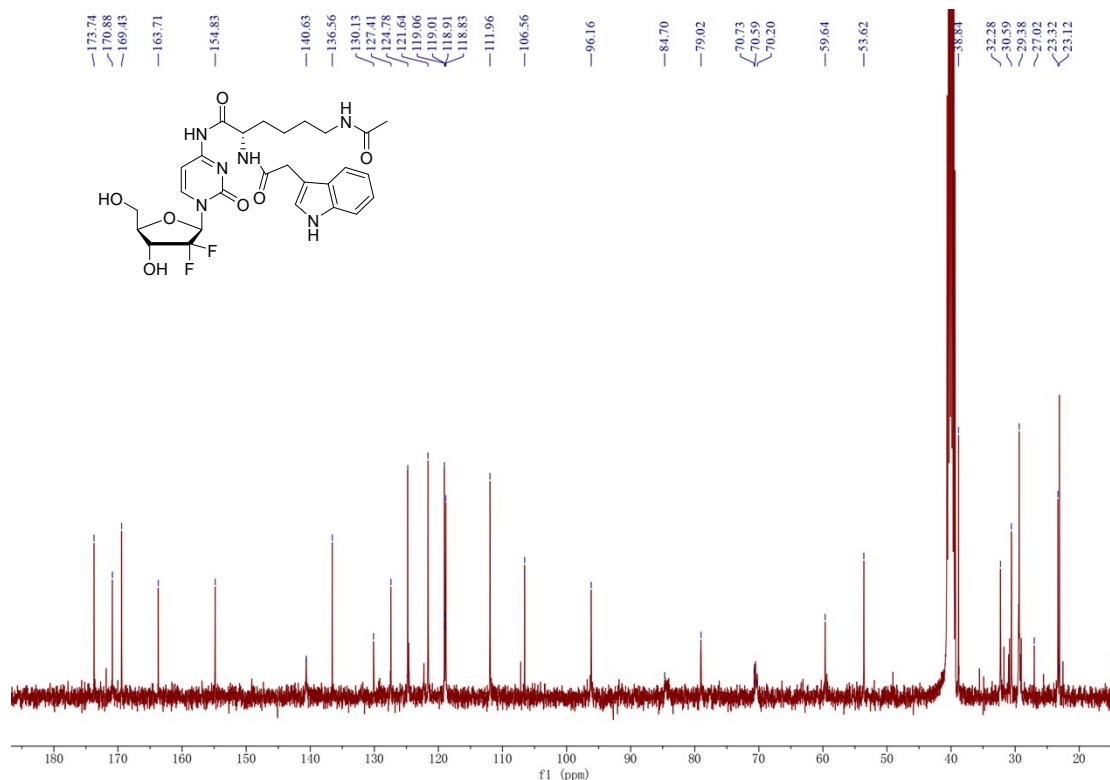

<sup>13</sup>C NMR spectrum of Compound 3.

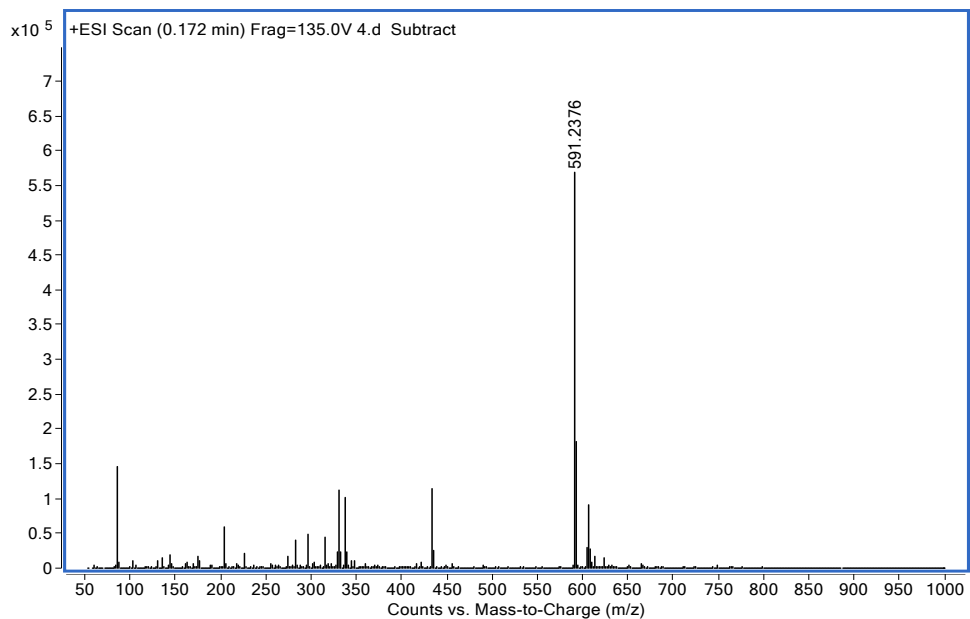

HRMS spectrum of Compound 3.

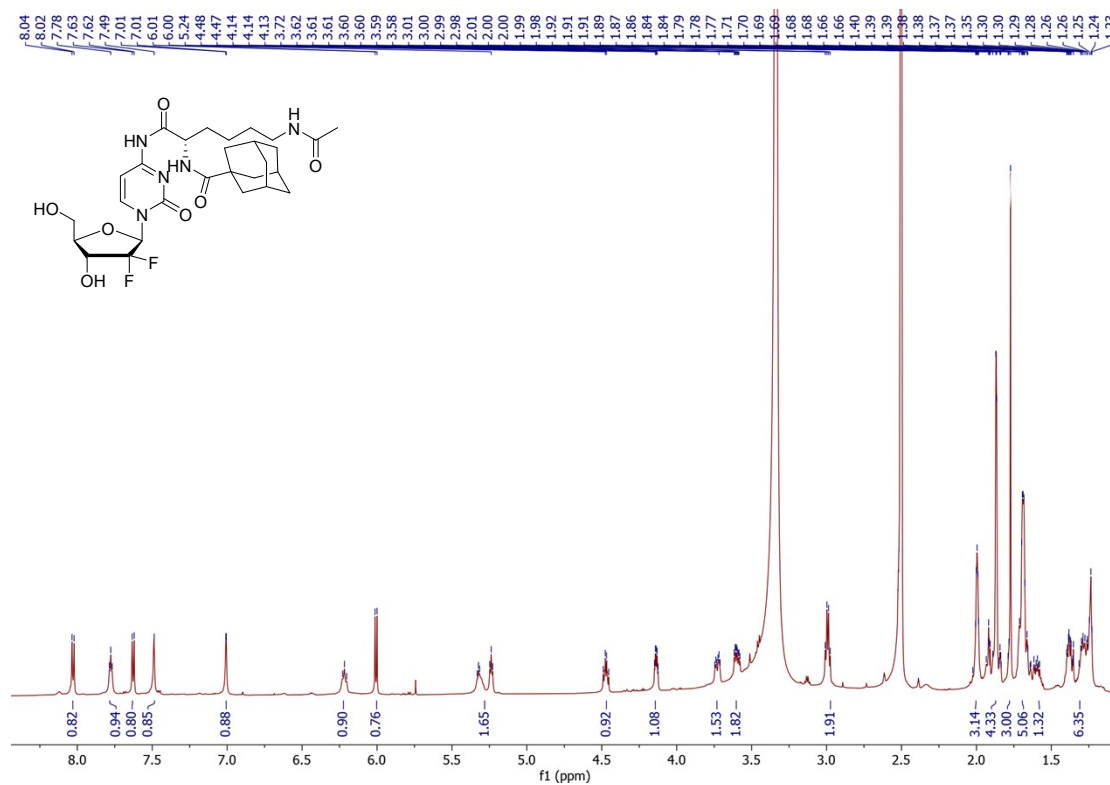

<sup>1</sup>H NMR spectrum of Compound 4.

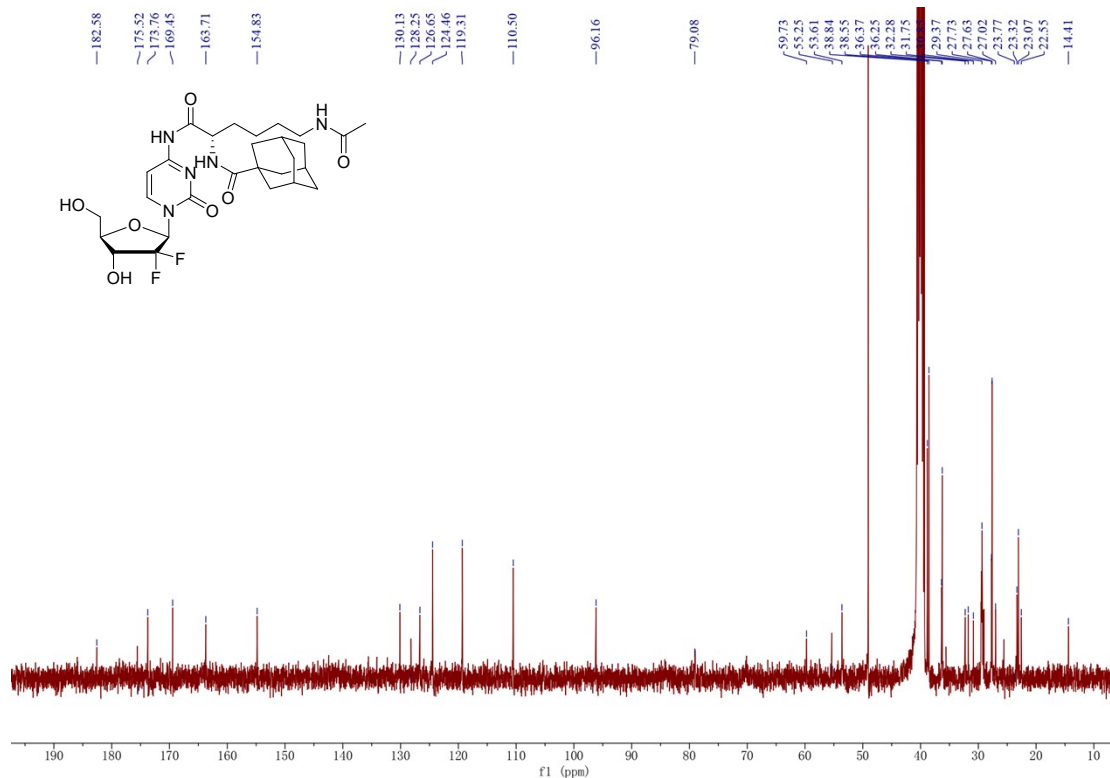

<sup>13</sup>C NMR spectrum of Compound 4.

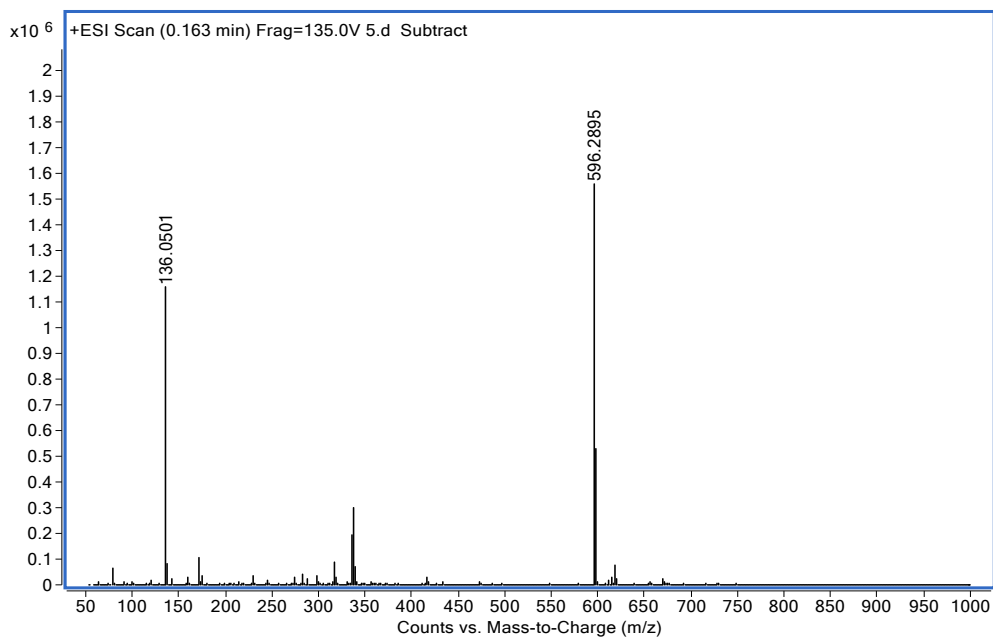

HRMS spectrum of Compound 4.

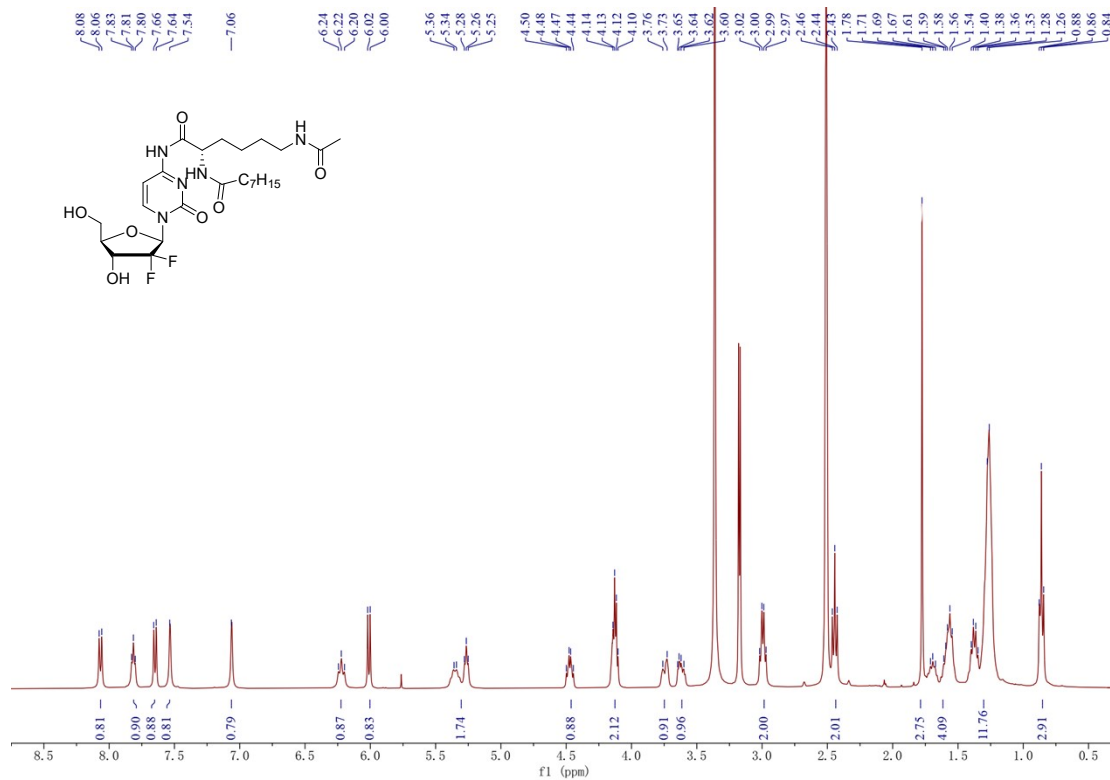

<sup>1</sup>H NMR spectrum of Compound 5.

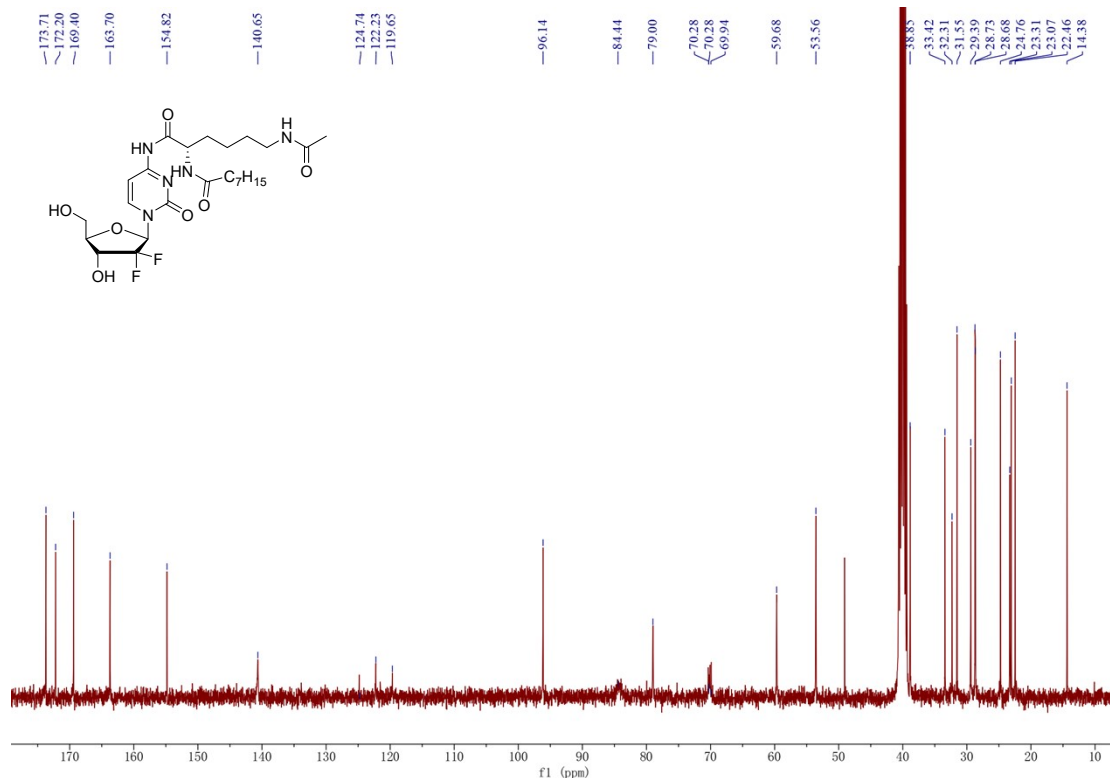

<sup>13</sup>C NMR spectrum of Compound 5.



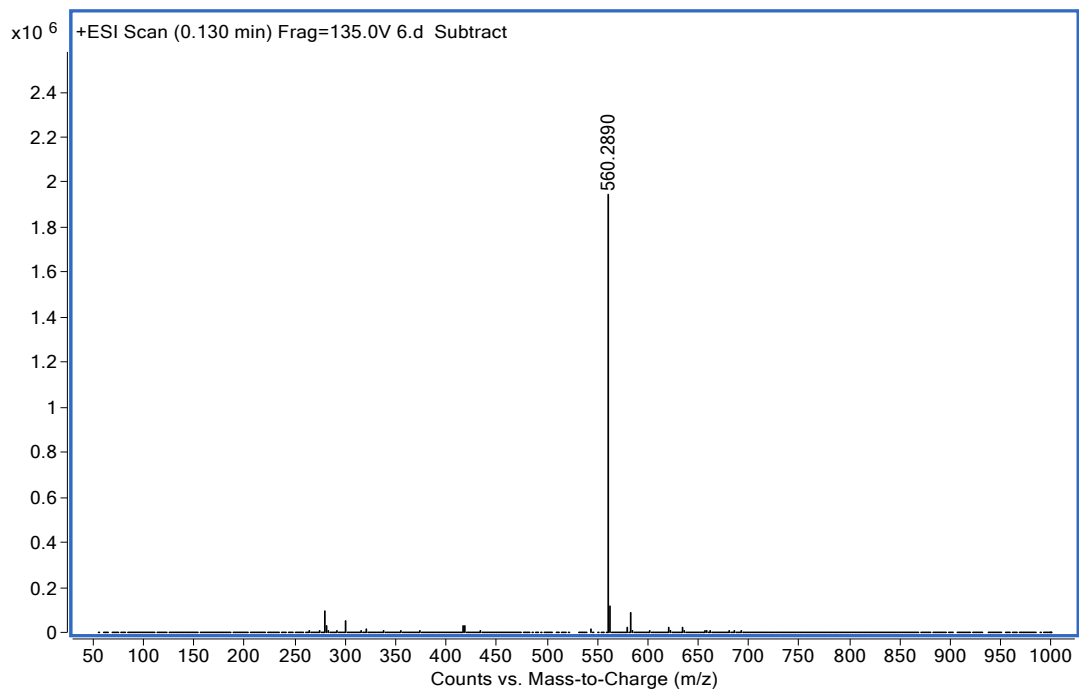

HRMS spectrum of Compound 5.

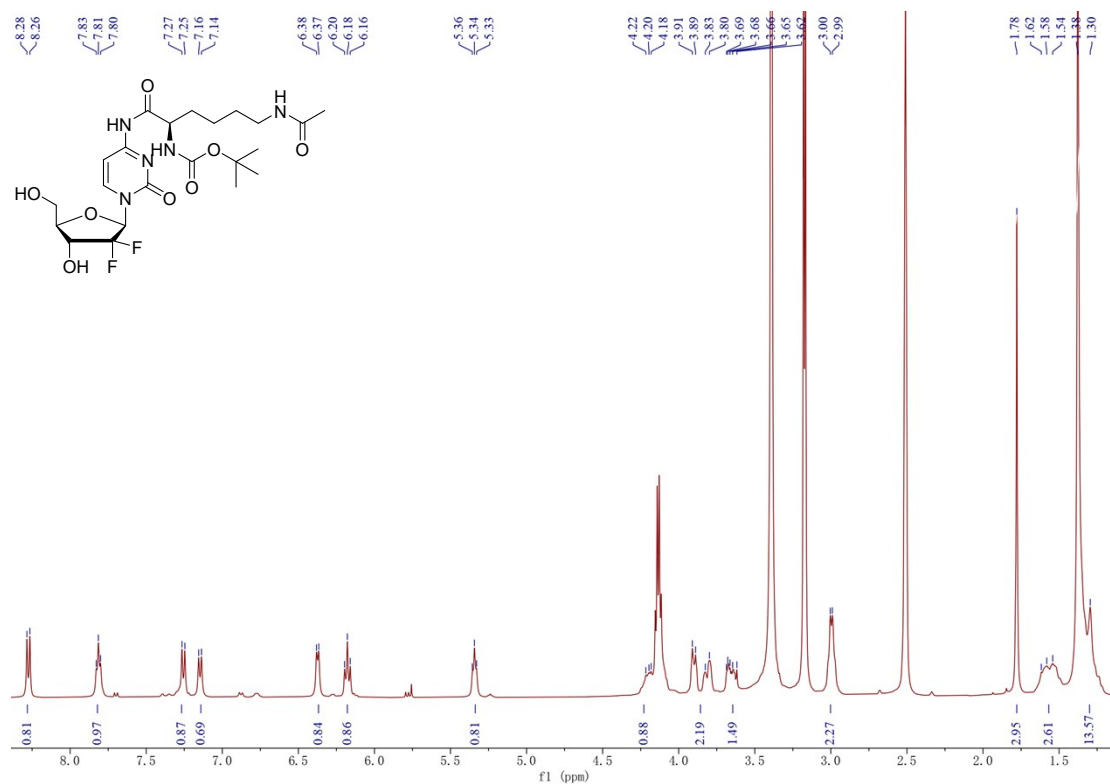

<sup>1</sup>H NMR spectrum of Compound 6.

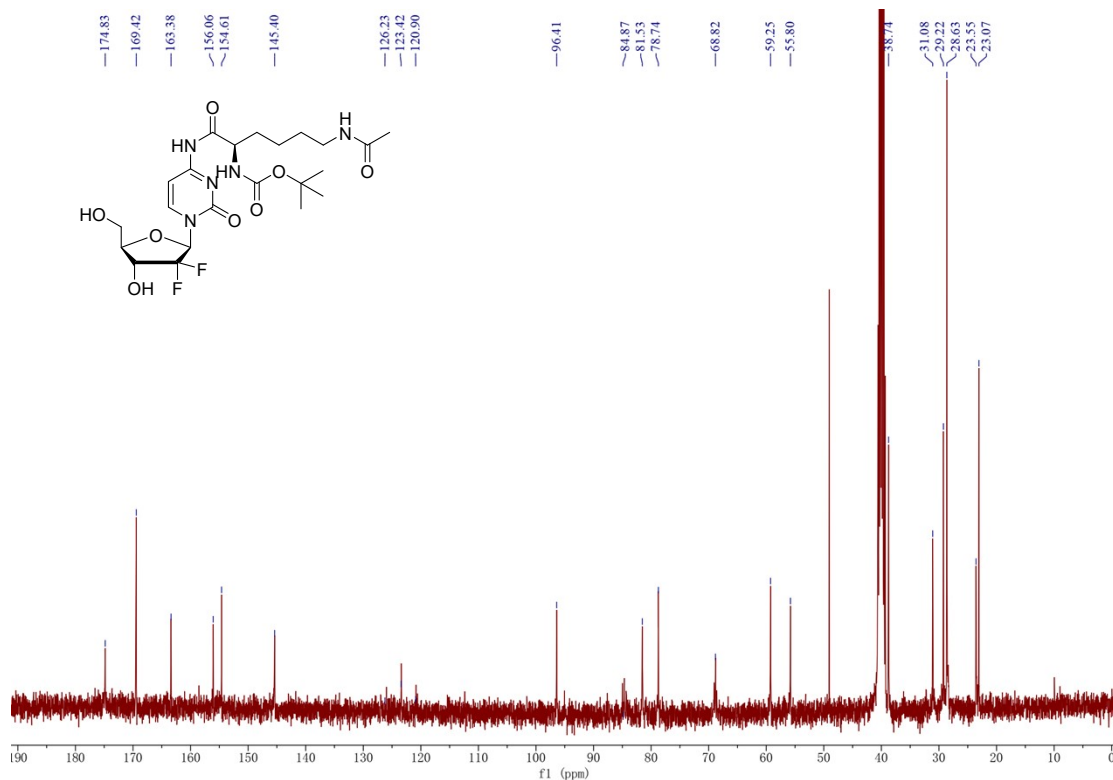

$^{13}\text{C}$  NMR spectrum of Compound 6.

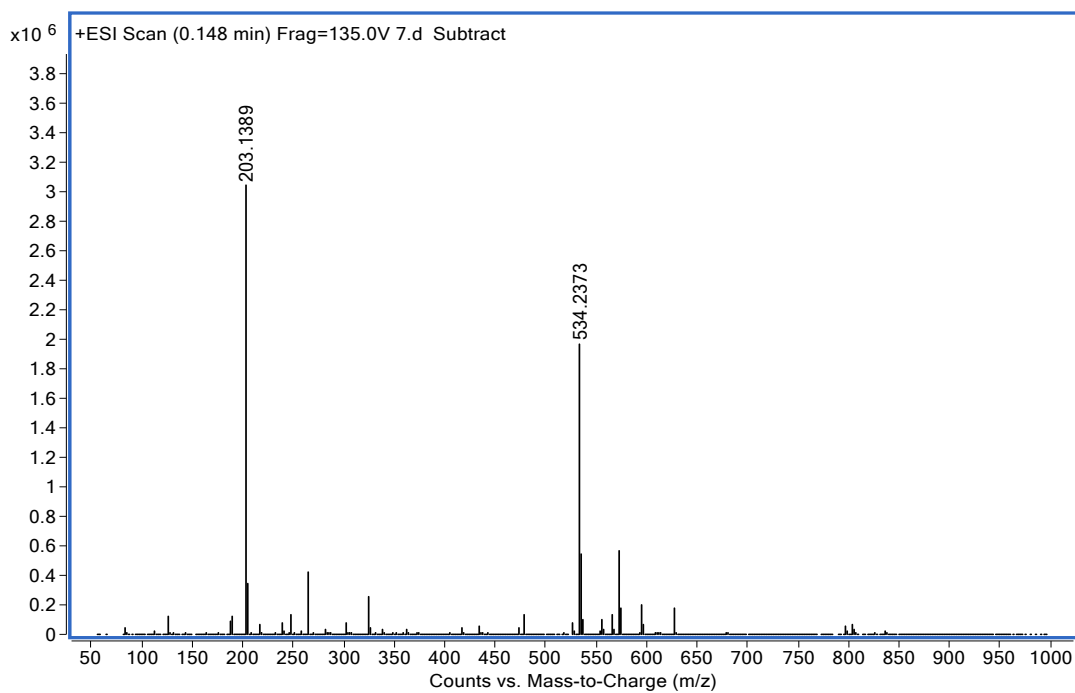

HRMS spectrum of Compound 6.

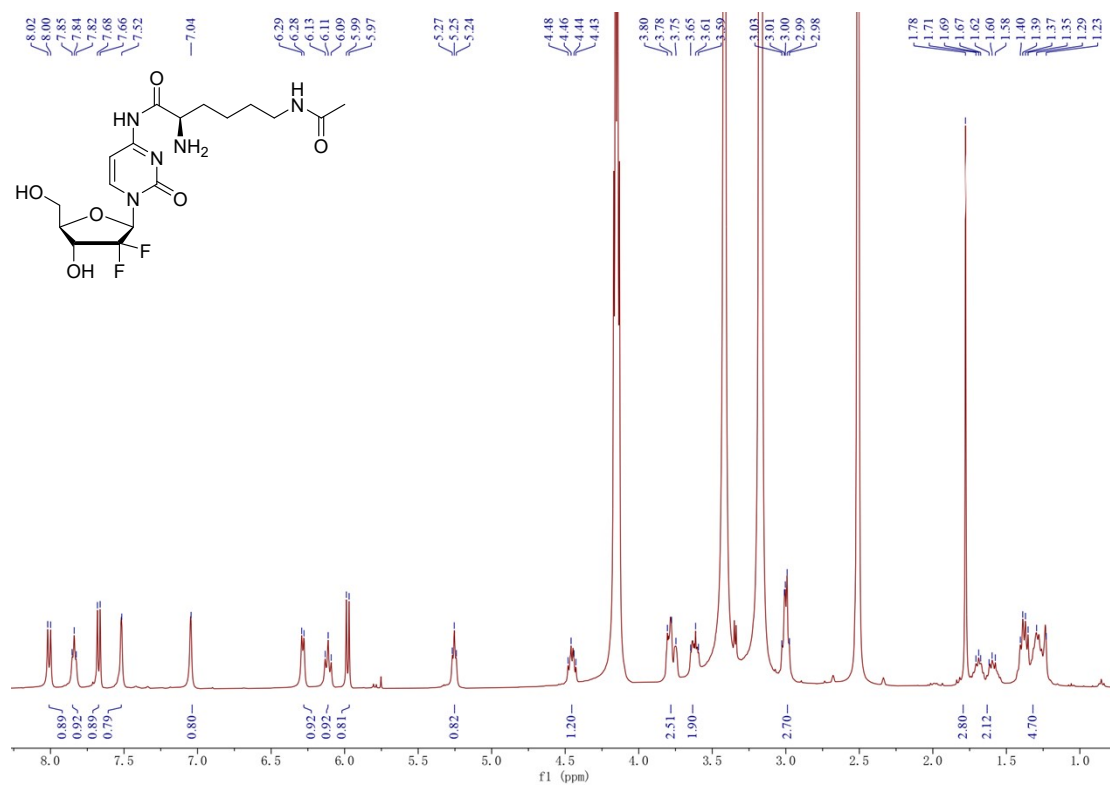

**<sup>1</sup>H NMR spectrum of Compound 7.**

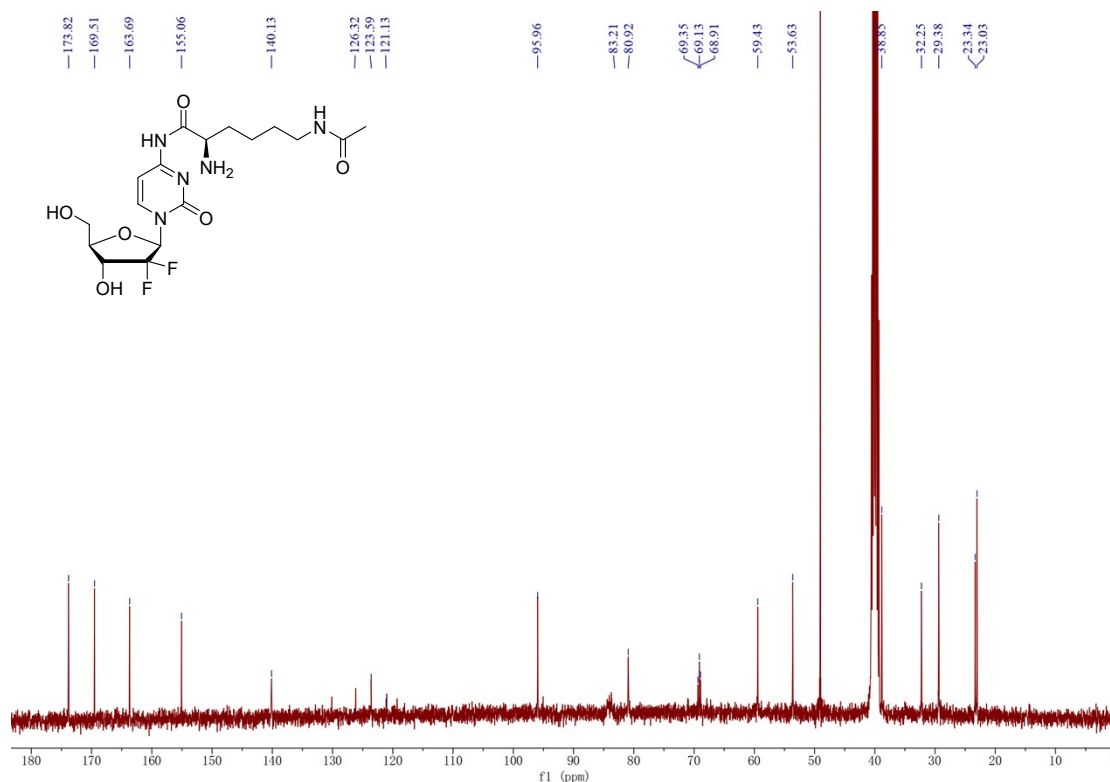

**<sup>13</sup>C NMR spectrum of Compound 7.**

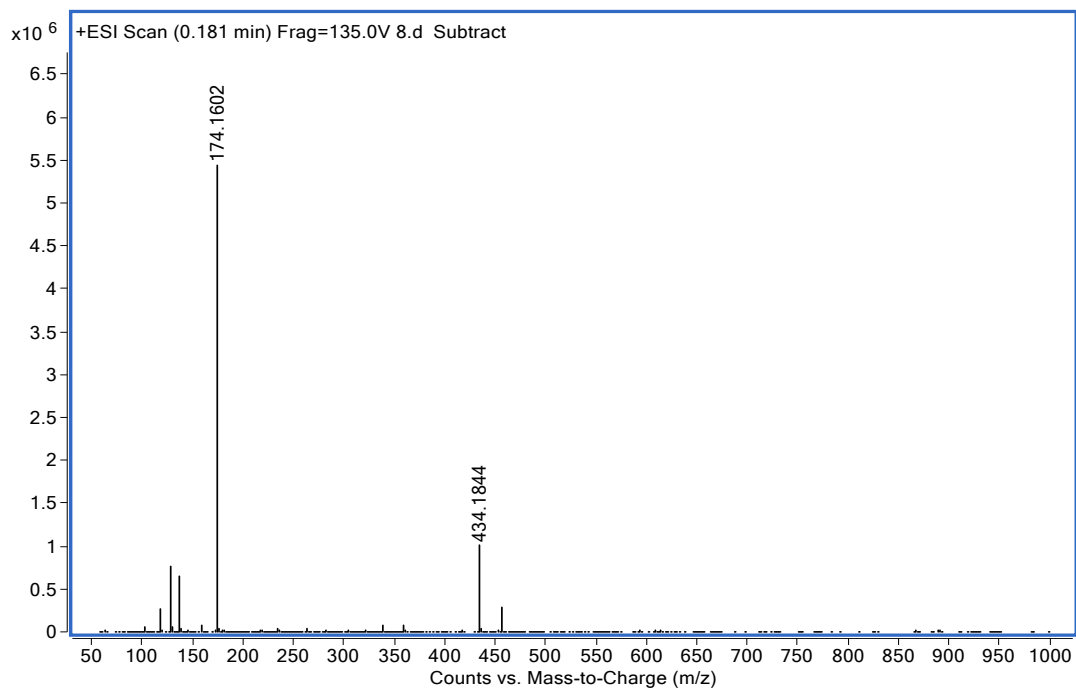

HRMS spectrum of Compound 7.

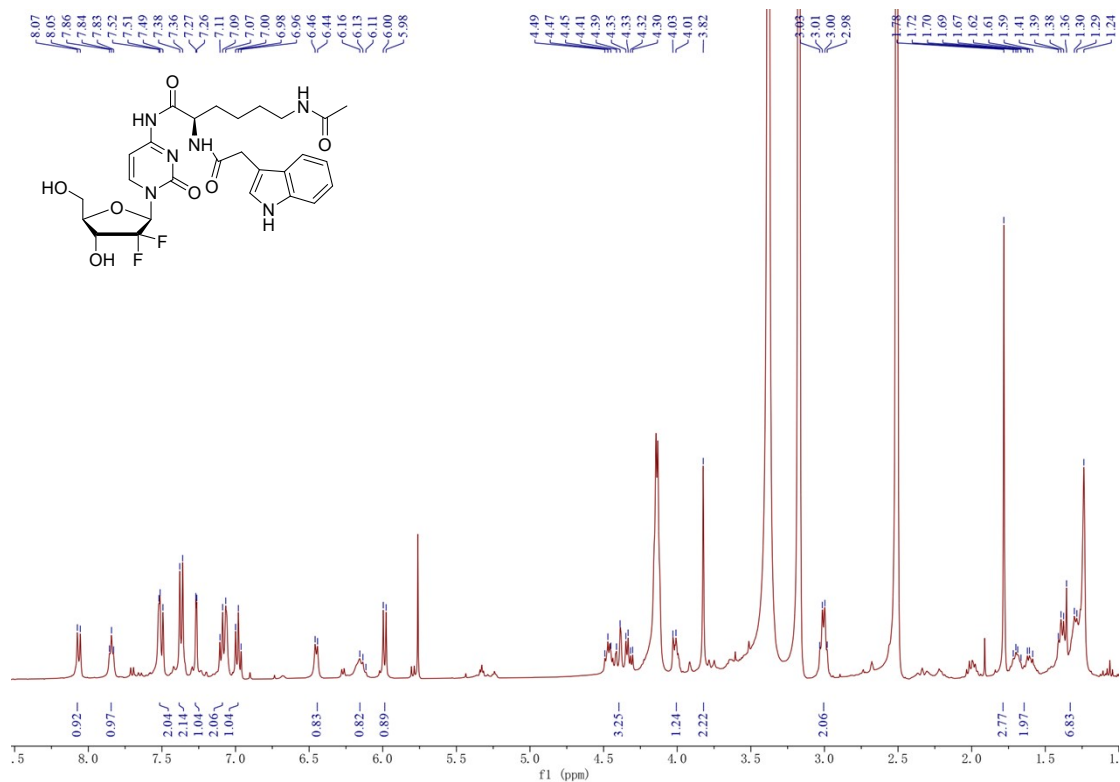

<sup>1</sup>H NMR spectrum of Compound 8.

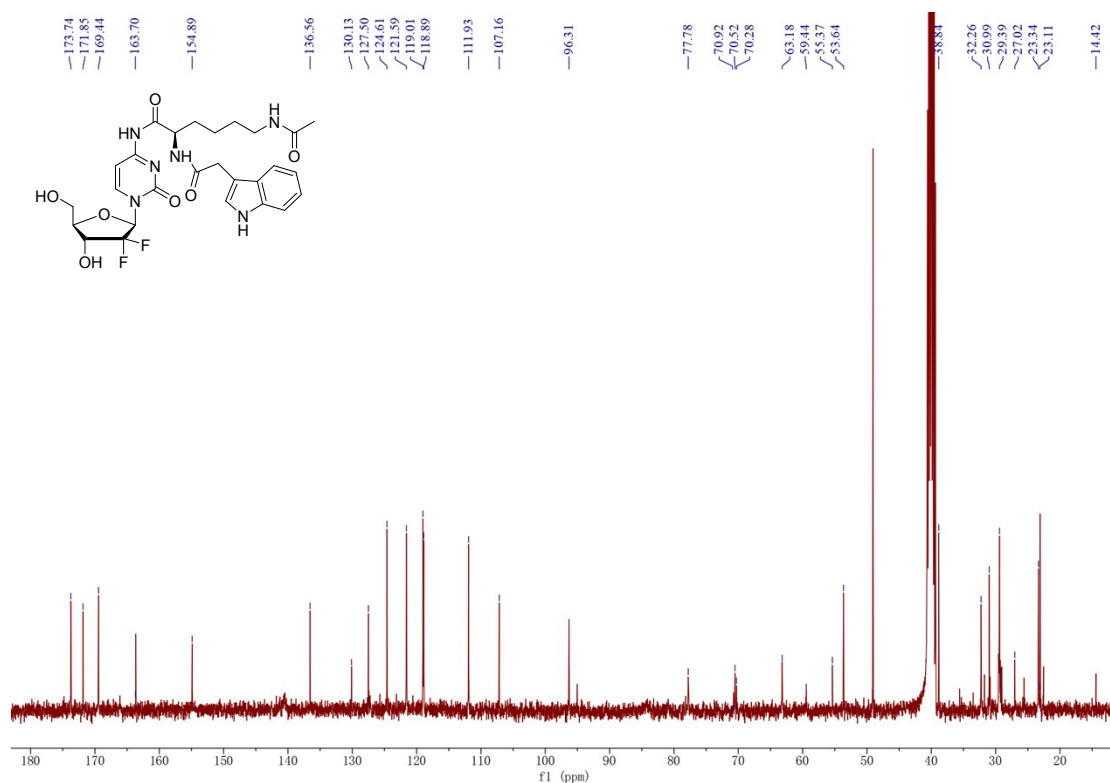

<sup>13</sup>C NMR spectrum of Compound 8.

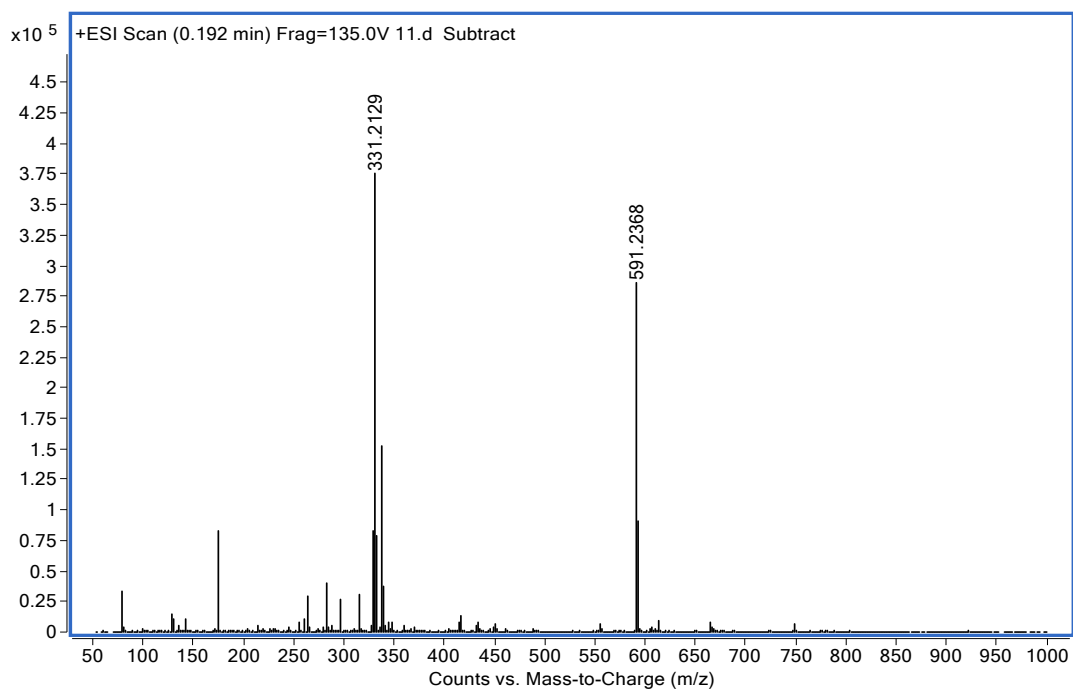

HRMS spectrum of Compound 8.

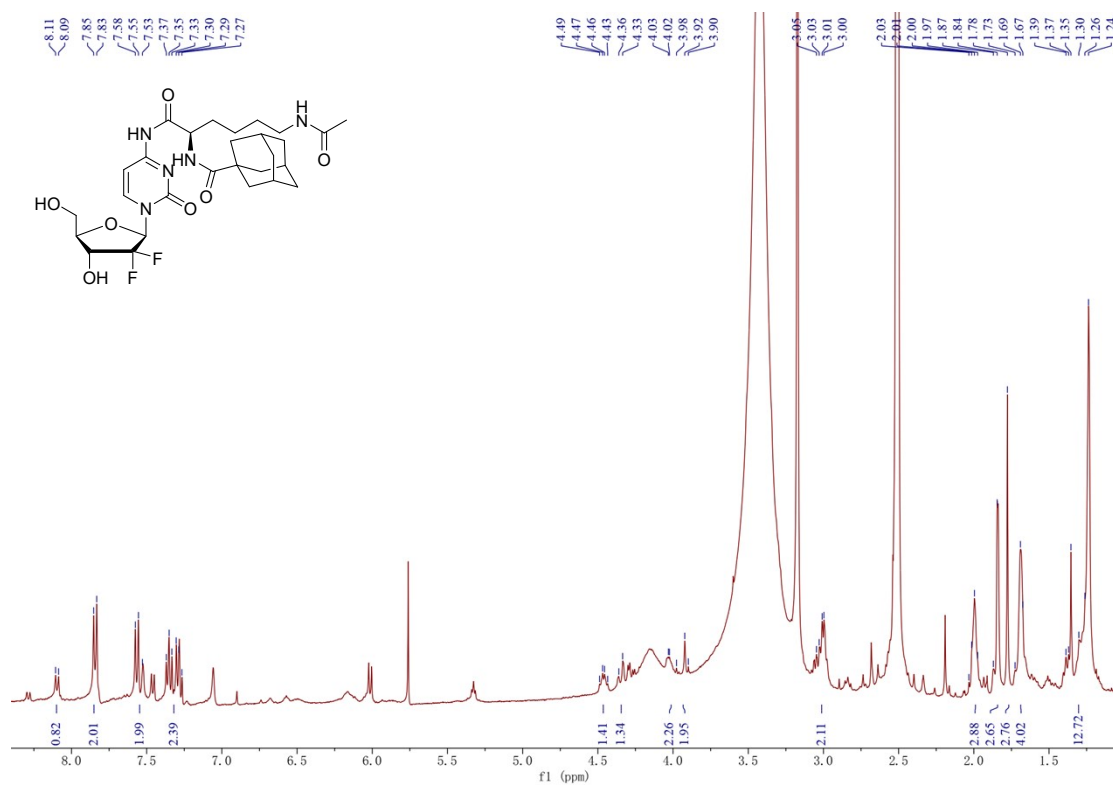

**<sup>1</sup>H NMR spectrum of Compound 9.**

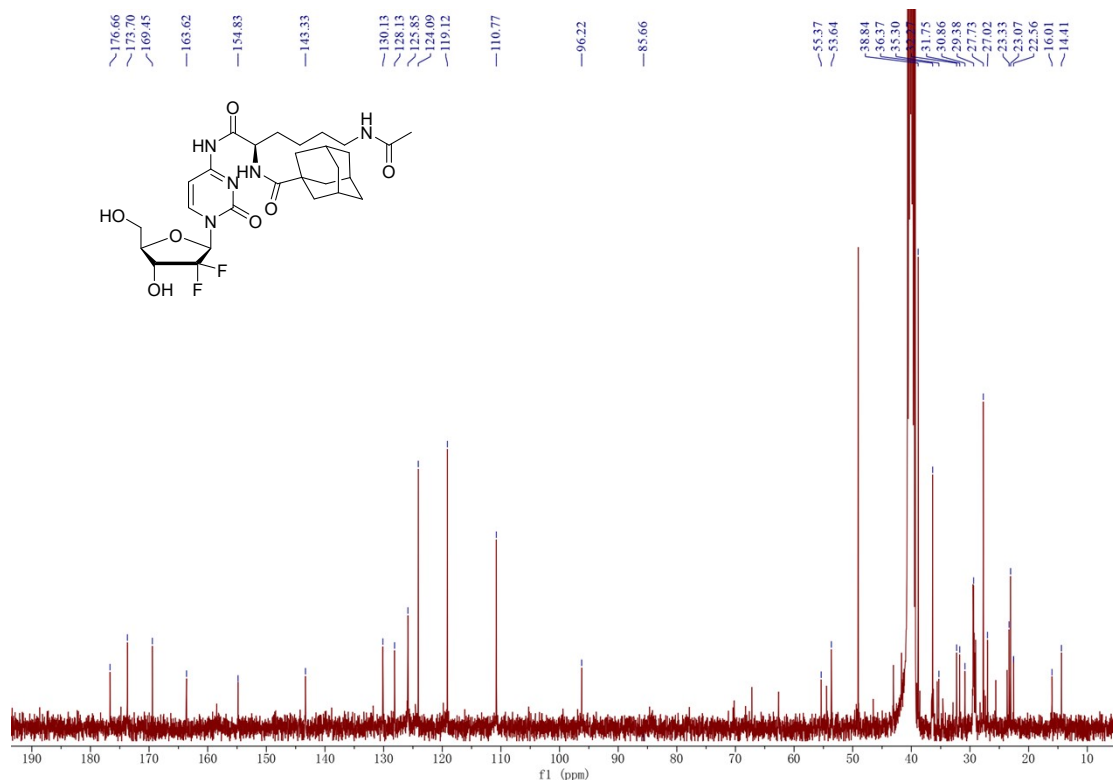

**<sup>13</sup>C NMR spectrum of Compound 9.**

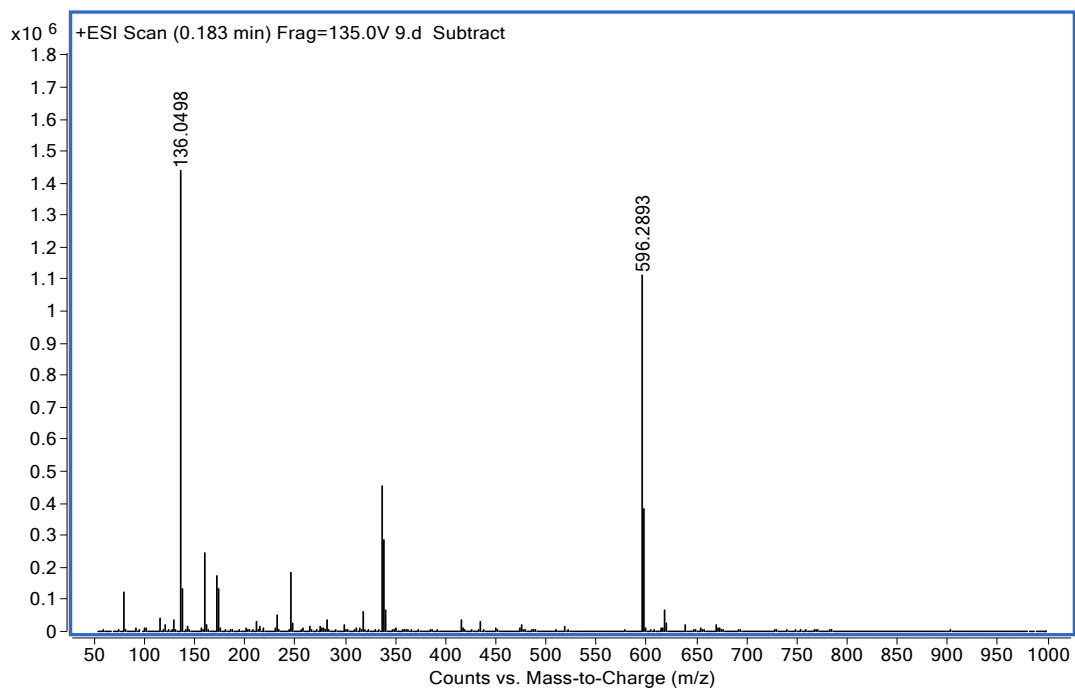

HRMS spectrum of Compound 9.

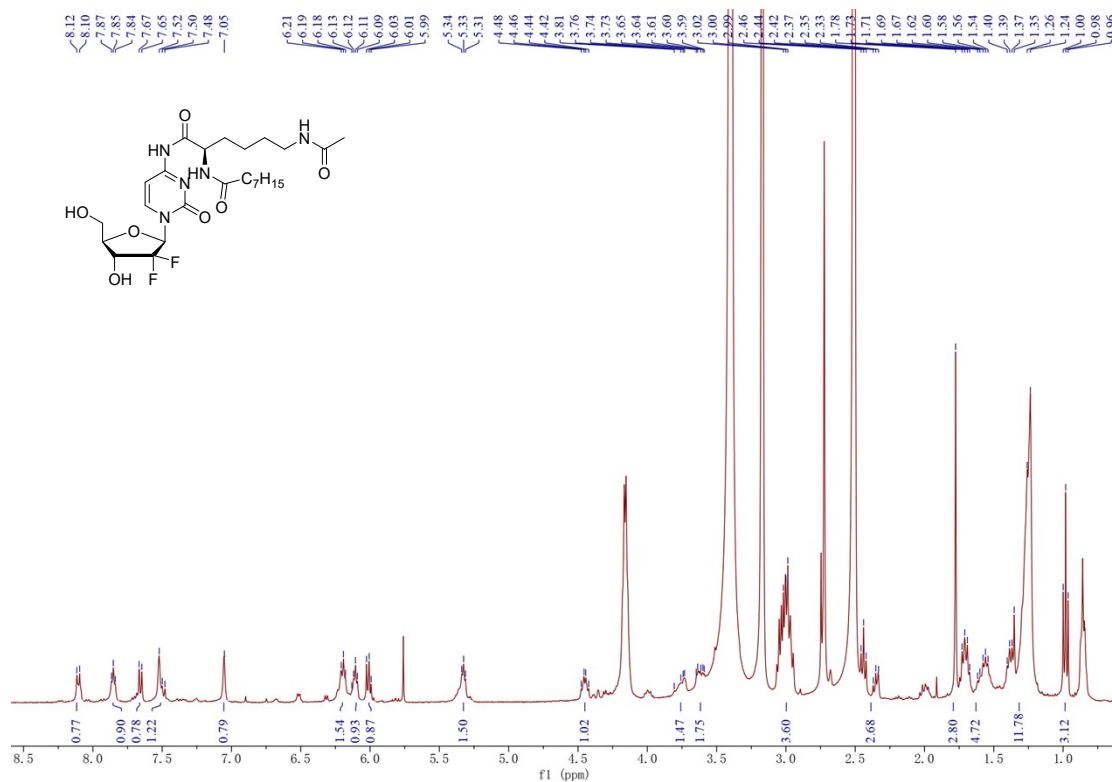

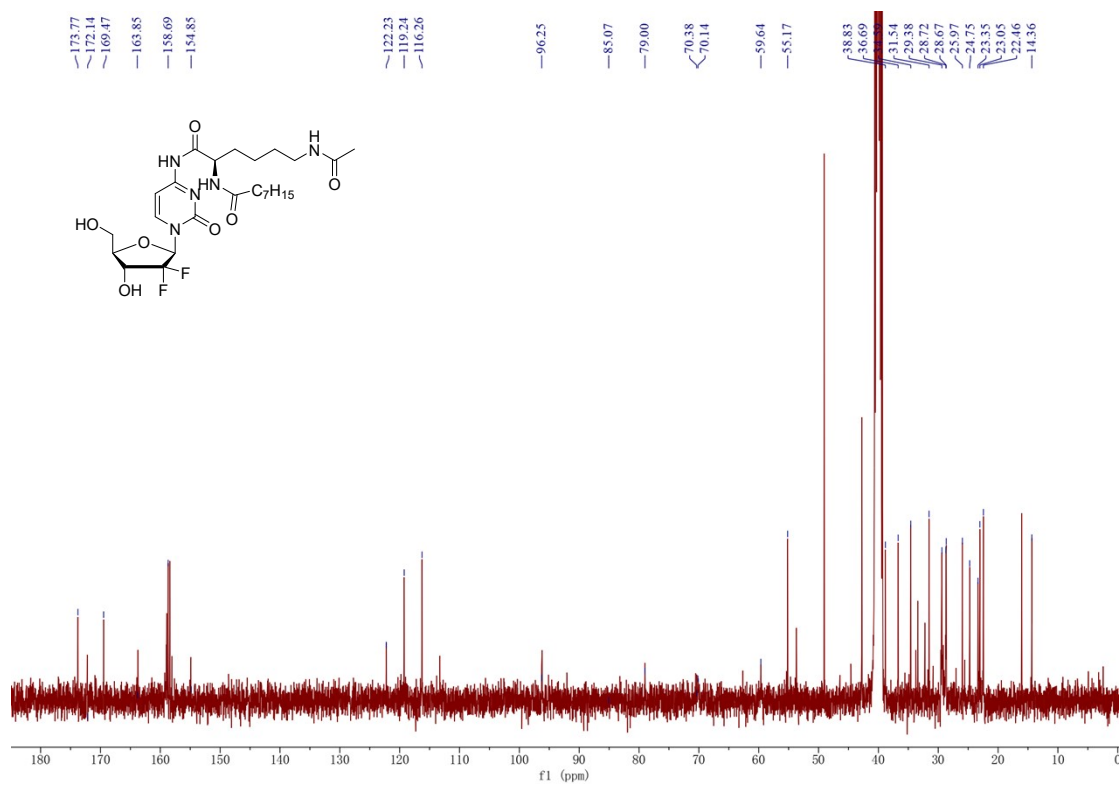

<sup>13</sup>C NMR spectrum of Compound 10.

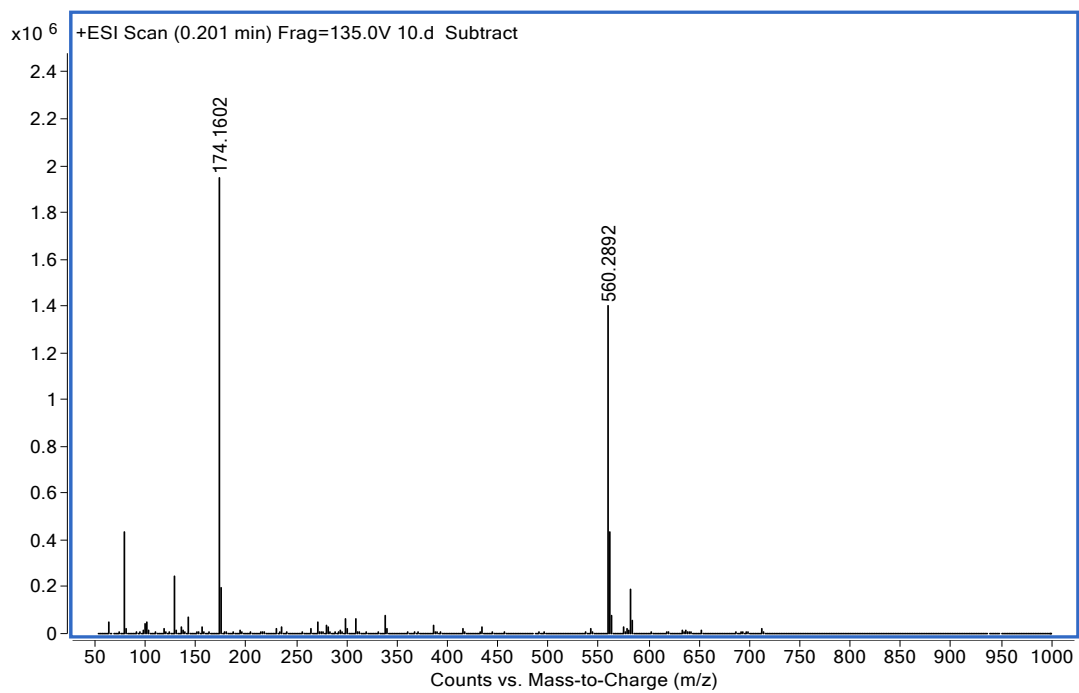

HRMS spectrum of Compound 10.



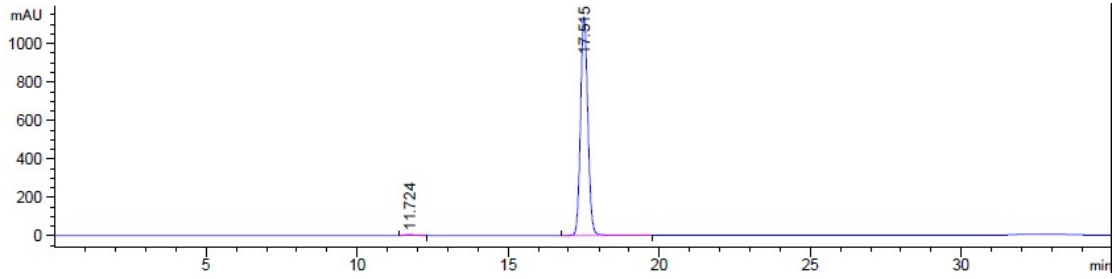

HPLC spectrum of Compound 1.

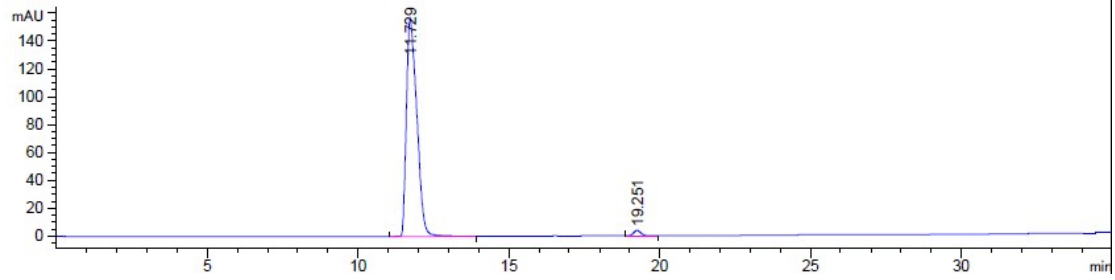

HPLC spectrum of Compound 2.

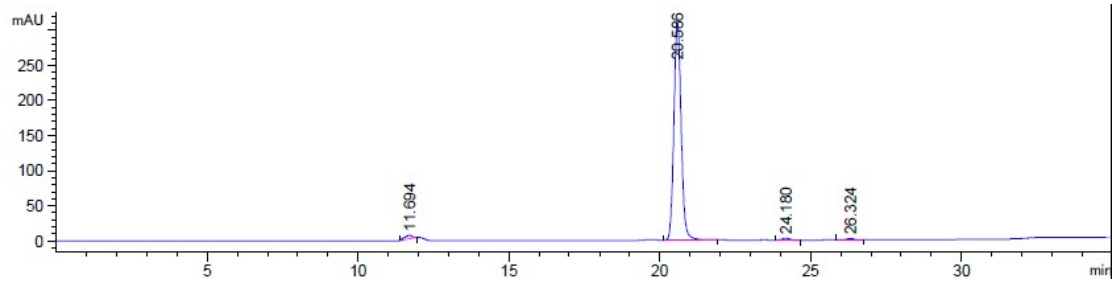

HPLC spectrum of Compound 3.

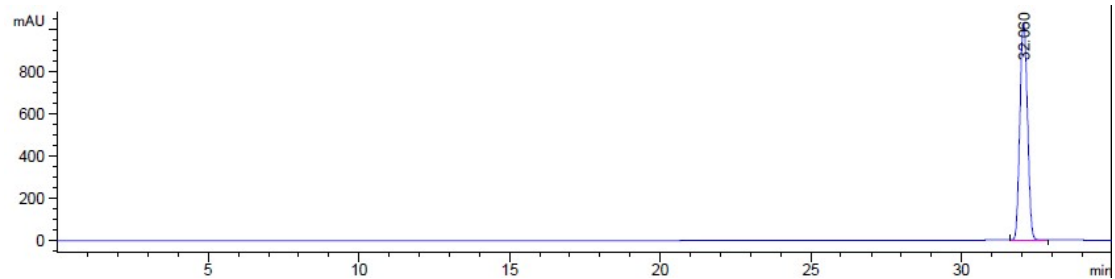

HPLC spectrum of Compound 4.

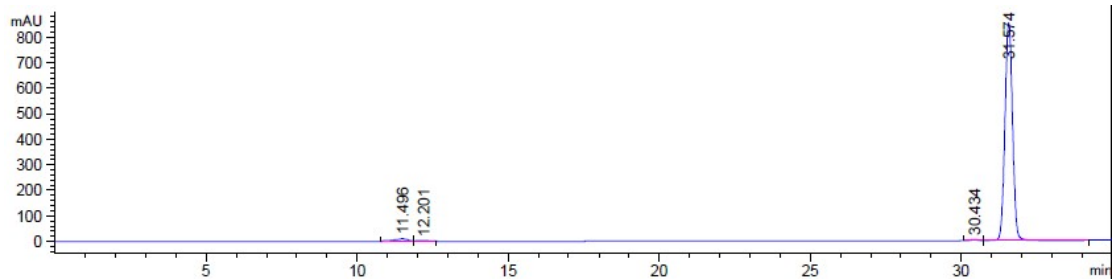

HPLC spectrum of Compound 5.

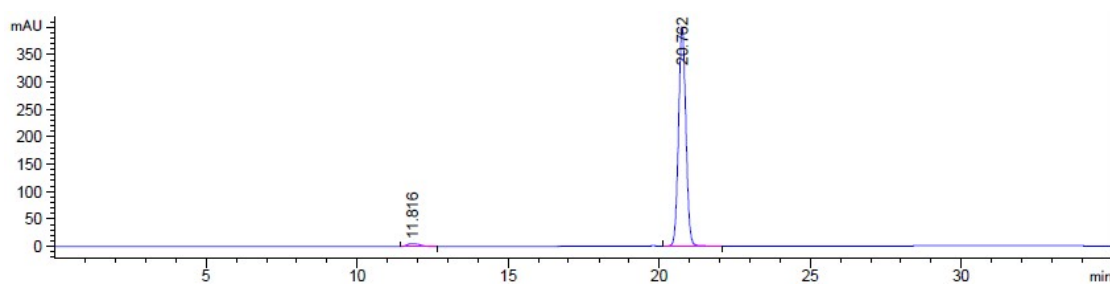

HPLC spectrum of Compound 6.

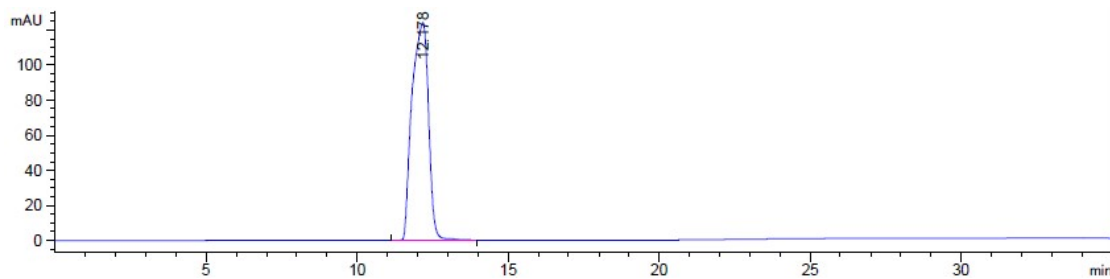

HPLC spectrum of Compound 7.

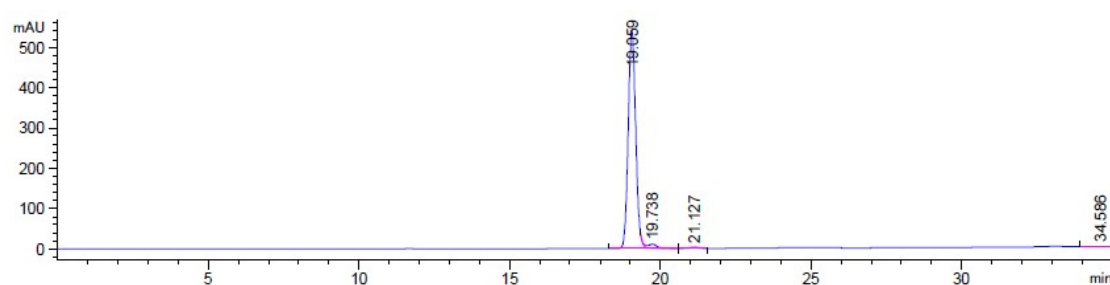

HPLC spectrum of Compound 8.

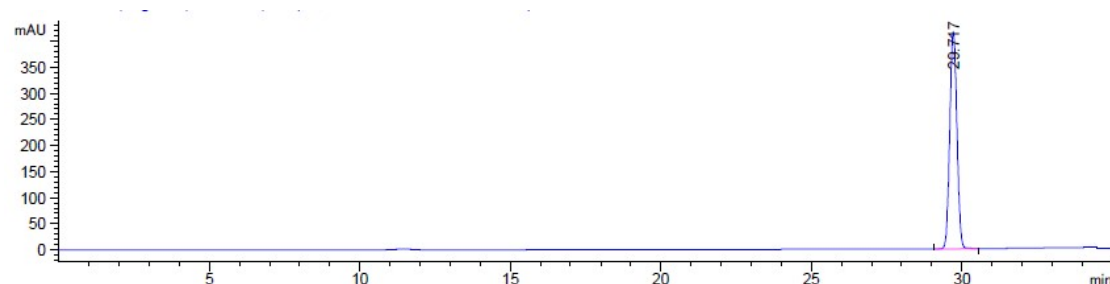

HPLC spectrum of Compound 9.

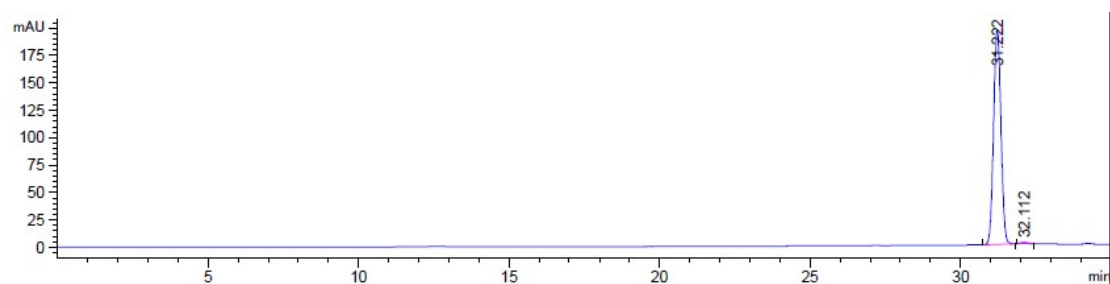

HPLC spectrum of Compound 10.
